# Supplementary material
Source: PubMed Central journal article supplement (PMC3370281)
Supplement: mmc1.pdf [file mmc1.pdf]

## Supplemental Data

### Family-Based Association Studies

#### for Next-Generation Sequencing

Yun Zhu and Momiao Xiong

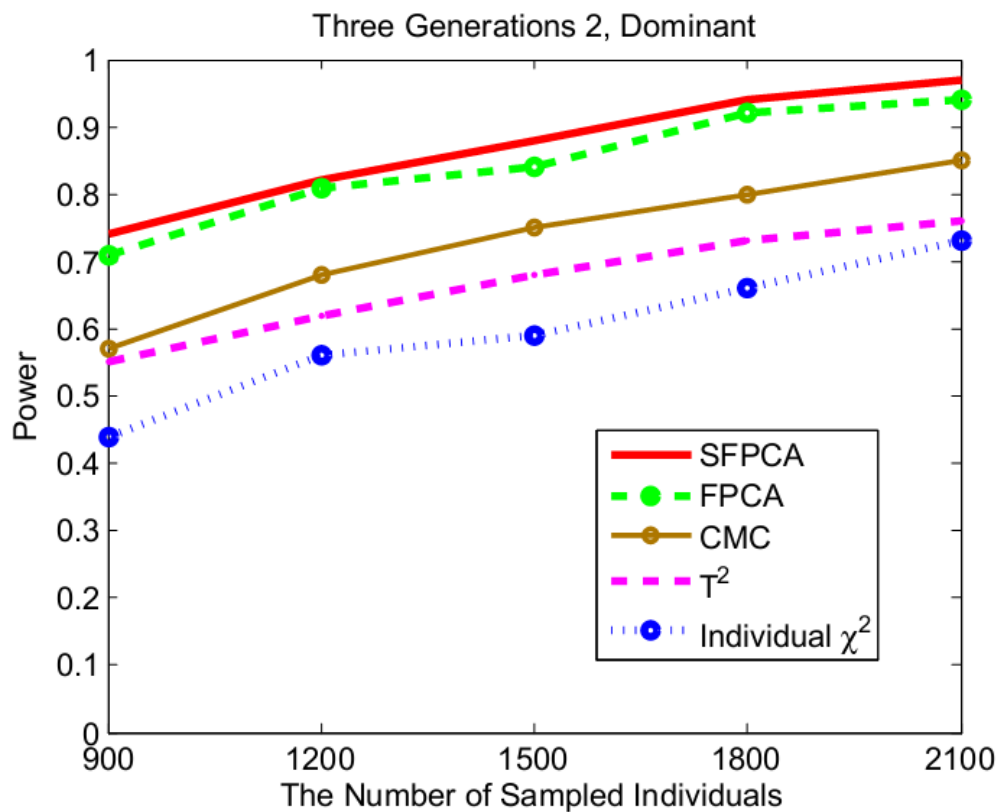

**Figure S1.** The power curve of five family-based statistics: the smoothed FPCA, FPCA without smoothing, CMC, generalized  $T^2$  and individual  $\chi^2$  statistic for three generation family group 2 as a function of the total number of individuals at the significance level  $\alpha = 0.05$  under the dominant model, assuming 20% of risk variants and a baseline penetrance of 0.01.

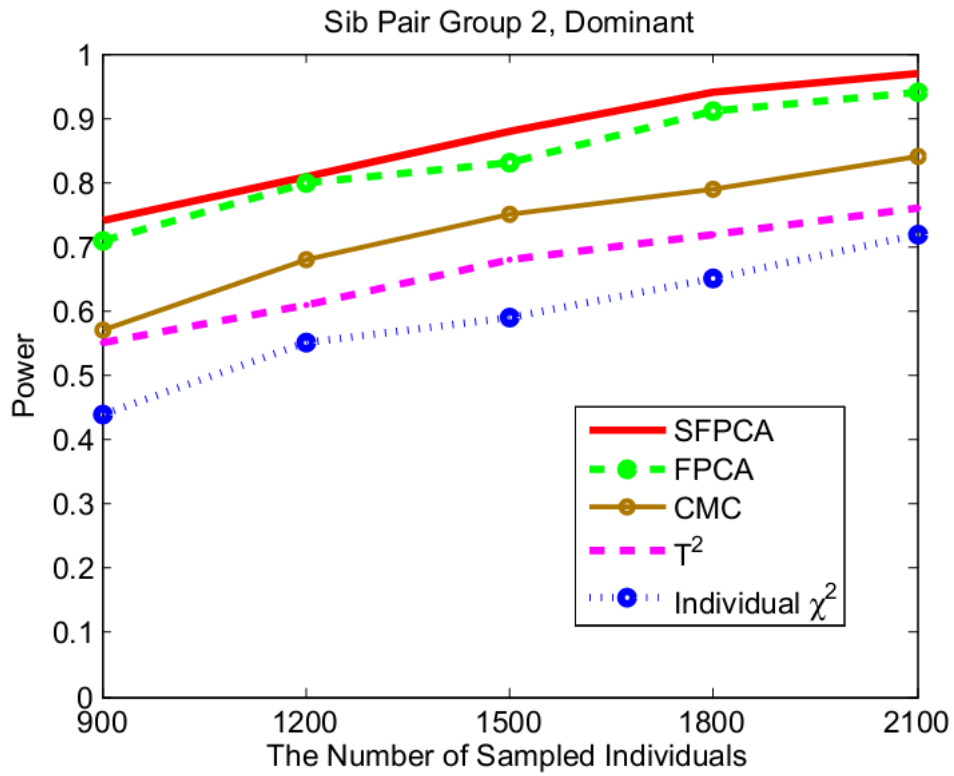

**Figure S2.** The power curve of five family-based statistics: the smoothed FPCA, FPCA without smoothing, CMC, generalized  $T^2$  and individual  $\chi^2$  statistic for sib-pair group 2 as a function of the total number of individuals at the significance level  $\alpha = 0.05$  under the dominant model, assuming 20% of risk variants and a baseline penetrance of 0.01.

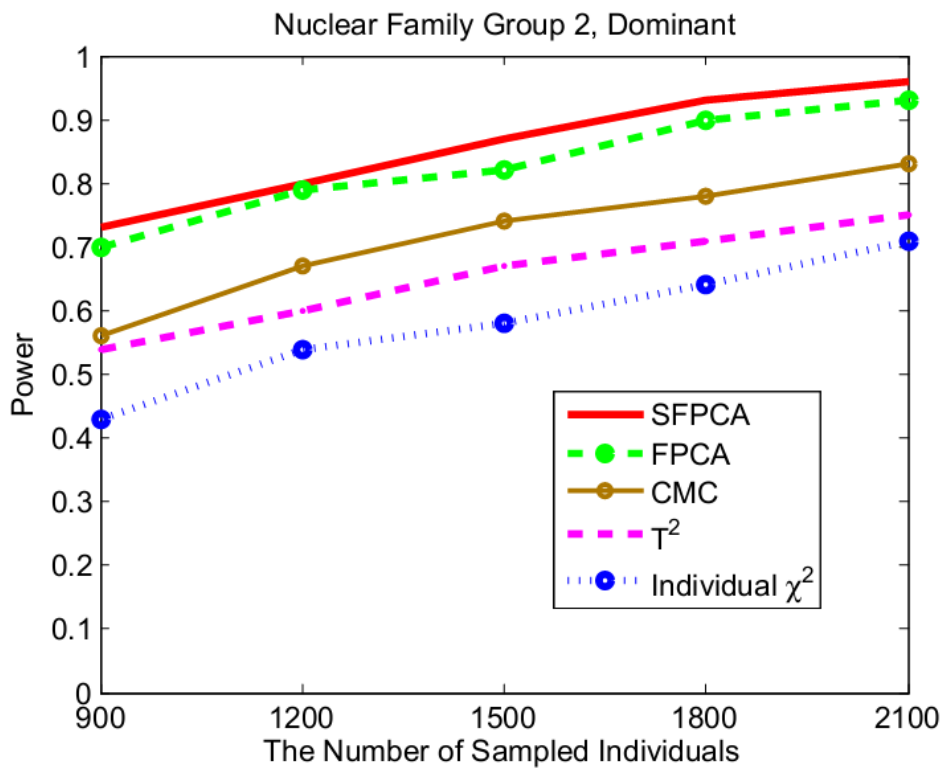

**Figure S3.** The power curve of five family-based statistics: the smoothed FPCA, FPCA without smoothing, CMC, generalized  $T^2$  and individual  $\chi^2$  statistic for nuclear family group 2 as a function of the total number of individuals at the significance level  $\alpha = 0.05$  under the dominant model, assuming 20% of risk variants and a baseline penetrance of 0.01.

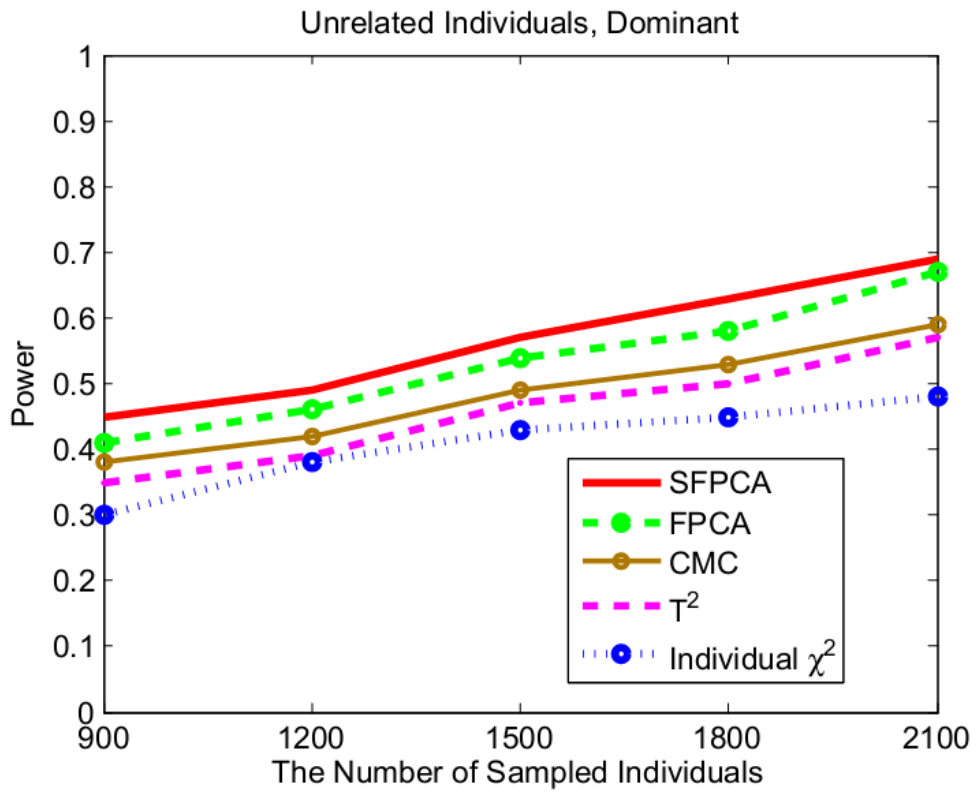

**Figure S4.** The power curve of five family-based statistics: the smoothed FPCA, FPCA without smoothing, CMC, generalized  $T^2$  and individual  $\chi^2$  statistic for unrelated cases and controls as a function of the total number of individuals at the significance level  $\alpha = 0.05$  under the dominant model, assuming 20% of risk variants and a baseline penetrance of 0.01.

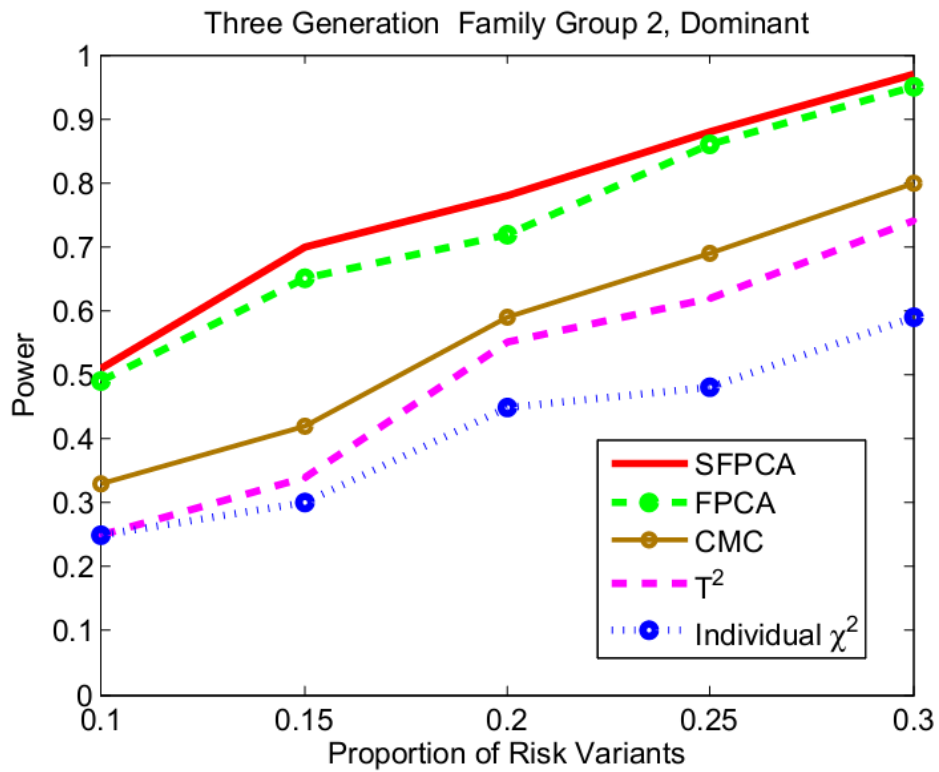

**Figure S5.** The power curve of five family-based statistics: the smoothed FPCA, FPCA without smoothing, CMC, generalized  $T^2$  and individual  $\chi^2$  statistic for three generation family group 2 as a function of the proportion of risk variants at the significance level  $\alpha = 0.05$  under the dominant model, assuming a total of 1,800 sampled individuals and a baseline penetrance of 0.01.

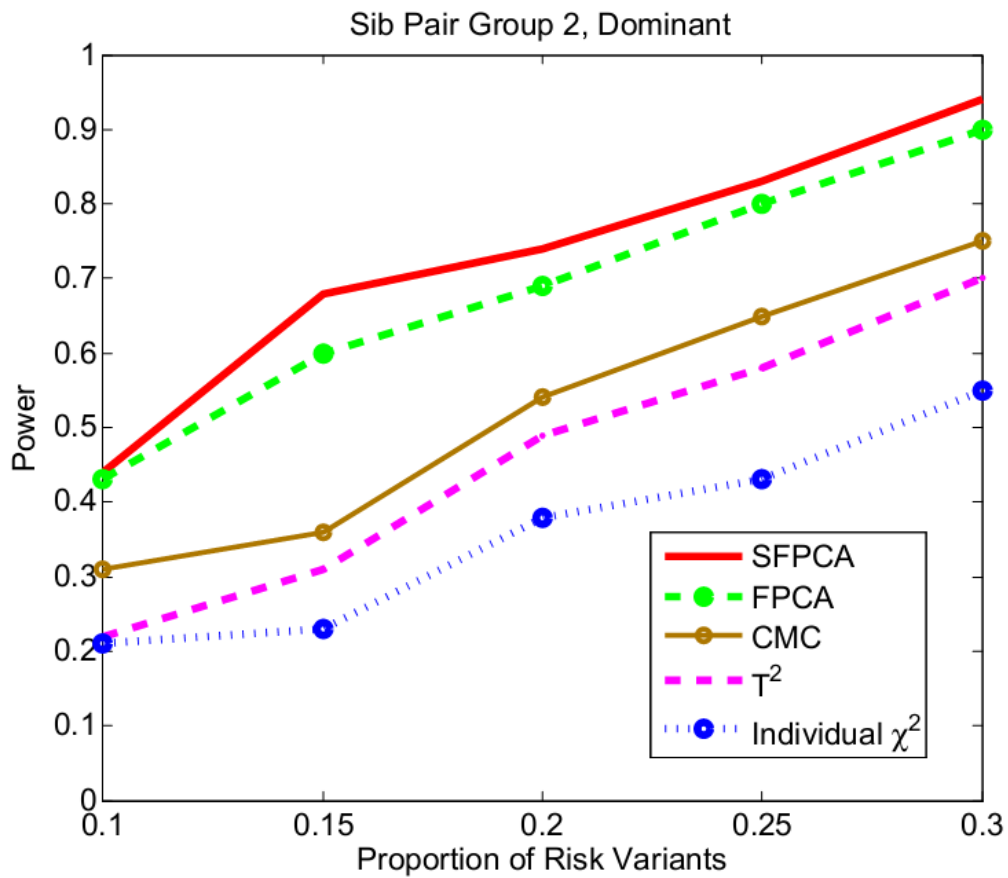

**Figure S6.** The power curve of five family-based statistics: the smoothed FPCA, FPCA without smoothing, CMC, generalized  $T^2$  and individual  $\chi^2$  statistic for sib-pair group 2 as a function of the proportion of risk variants at the significance level  $\alpha = 0.05$  under the dominant model, assuming a total of 1,800 sampled individuals and a baseline penetrance of 0.01.

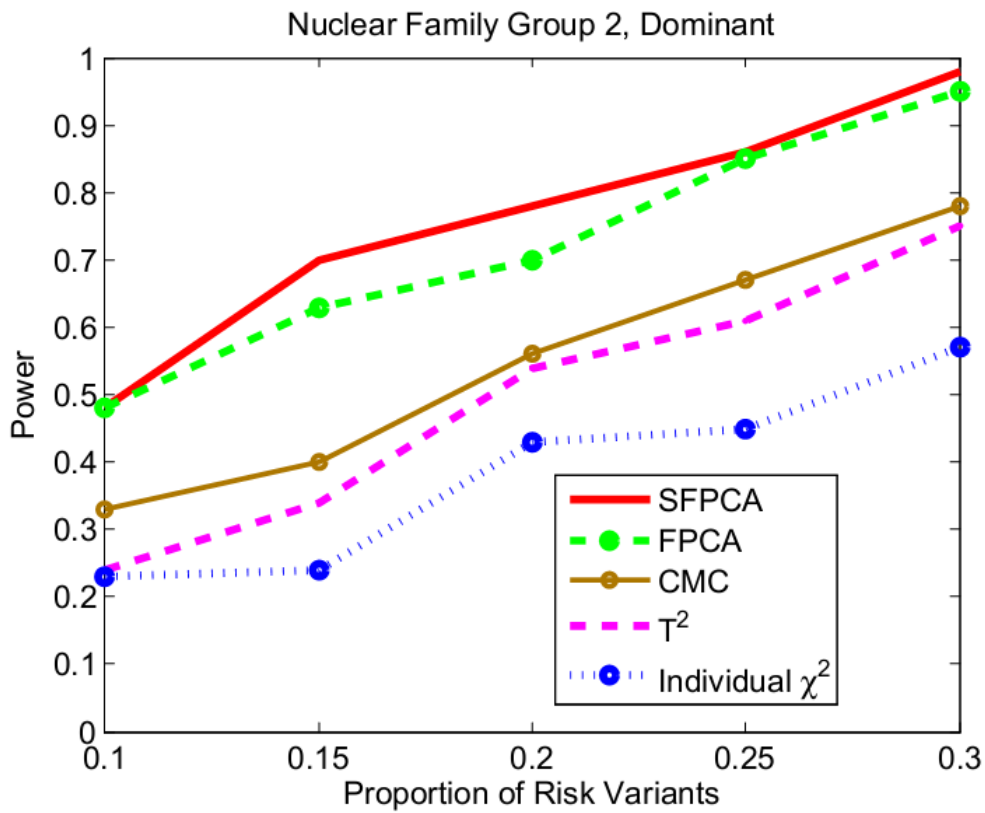

**Figure S7.** The power curve of five family-based statistics: the smoothed FPCA, FPCA without smoothing, CMC, generalized  $T^2$  and individual  $\chi^2$  statistic for nuclear family group 2 as a function of the proportion of risk variants at the significance level  $\alpha = 0.05$  under the dominant model, assuming a total of 1,800 sampled individuals and a baseline penetrance of 0.01.

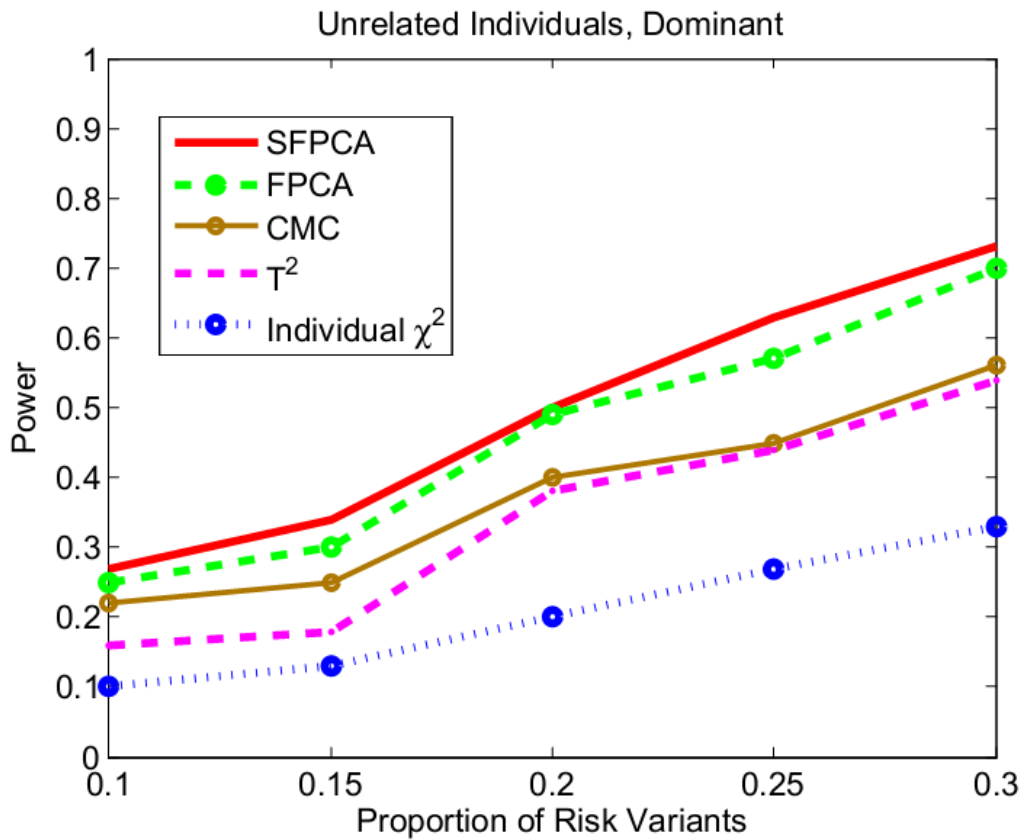

**Figure S8.** The power curve of five family-based statistics: the smoothed FPCA, FPCA without smoothing, CMC, generalized  $T^2$  and individual  $\chi^2$  statistic for unrelated cases and controls as a function of the proportion of risk variants at the significance level  $\alpha = 0.05$  under the dominant model, assuming a total of 1,800 sampled individuals and a baseline penetrance of 0.01.



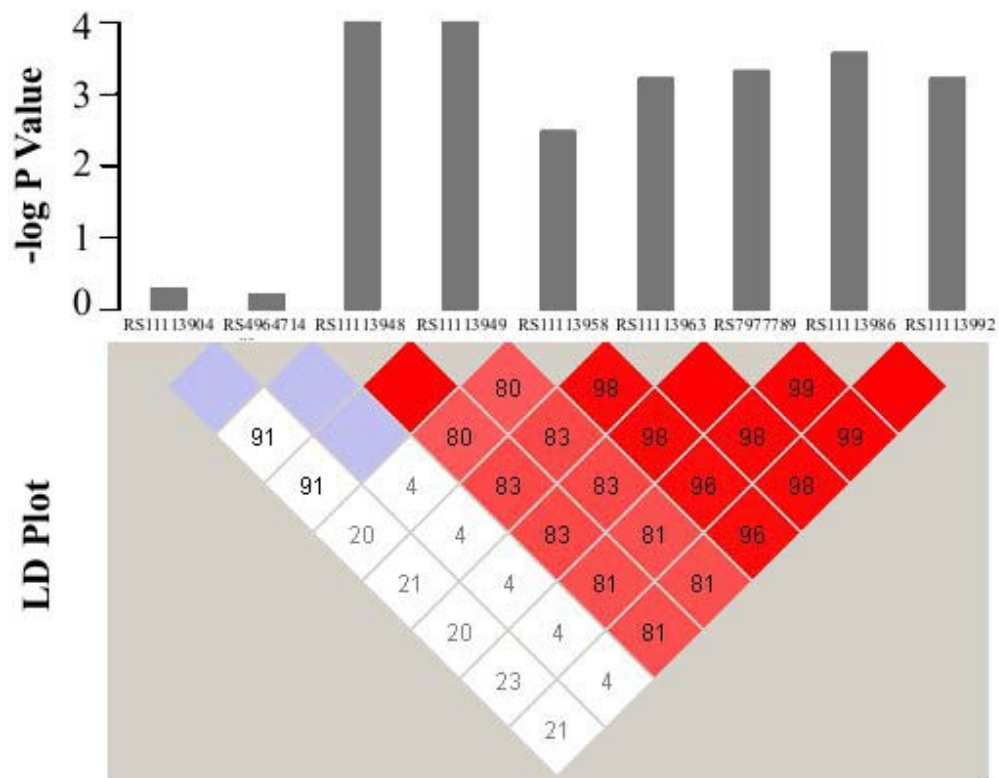

**Figure S9.**  $-\log P$ -values of individual test for association of nine rare variants (MAF  $< 0.05$ ) by the family-based corrected single marker  $\chi^2$  test within gene *CRY1* and linkage disequilibrium pattern among them.
